# Supplementary material for: Apple SERRATE negatively mediates drought resistance by regulating MdMYB88 and MdMYB124 and microRNA biogenesis
Source: PubMed Central journal article supplement (PMC7326988; doi:10.1038/s41438-020-0320-6), 2020-07-01
Supplement: 41438_2020_320_MOESM1_ESM.pdf [file 41438_2020_320_MOESM1_ESM.pdf]

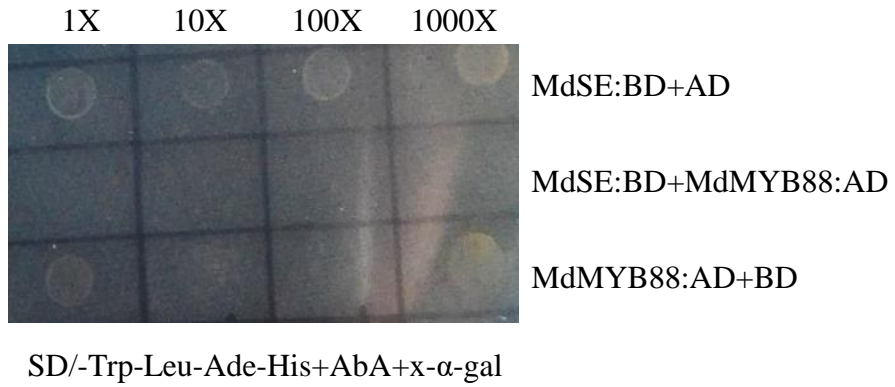

**Figure S1 MdSE does not interact with in yeast.** The CDS of *MdSE* and *MdMYB88* were introduced into pGBDT7 and pGADT7, respectively. Positive clones were selected on SD medium (-Leu-Trp-His-Ade + x- $\alpha$ -gal) to identify protein interactions.

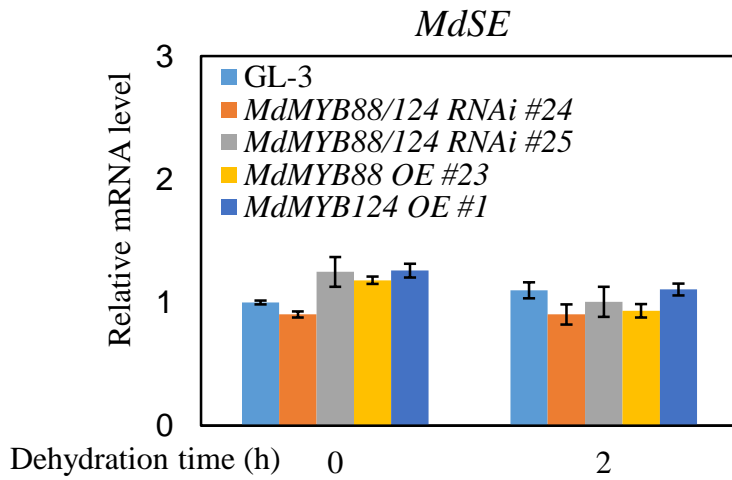

**Figure S2 MdMYB88 and MdMYB124 do not regulate *MdSE* transcript under control or drought conditions.** Transcript level of *MdSE* in *MdMYB88* OE, *MdMYB124* OE and *MdMYB88/124* RNAi plants. Data are means  $\pm$  SD (n = 3). Student's *t* test was performed and statistically significant differences were indicated by \* (P<0.05), \*\* (P<0.01) or \*\*\* (P<0.001).

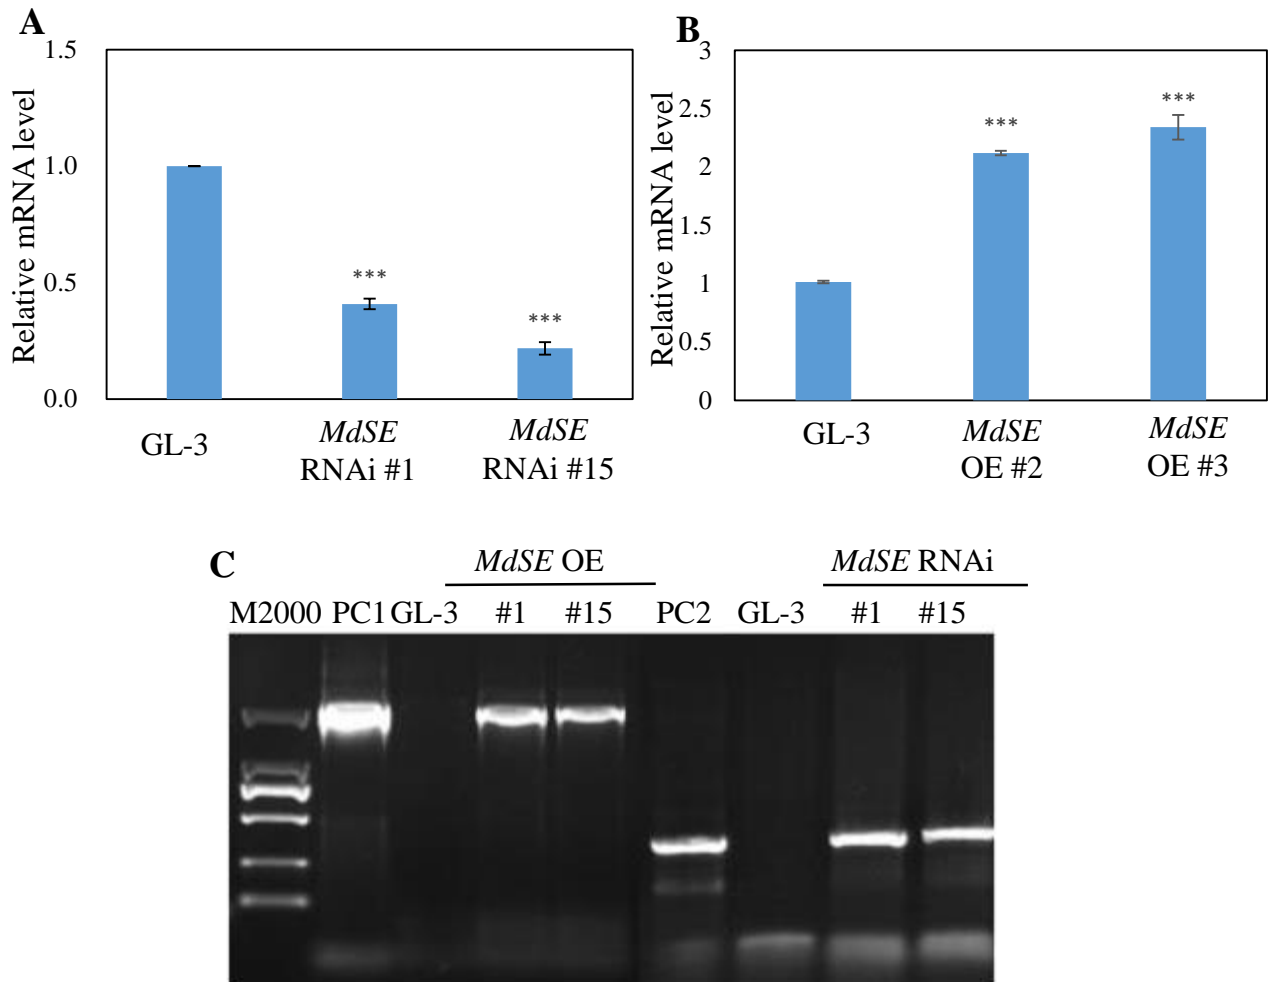

**Figure S3 Identification of *MdSE* RNAi or OE transgenic plants.** (A) and (B) Transcript level of *MdSE* in *MdSE* RNAi (A) and OE (B) plants. Data are means  $\pm$  SD (n = 3). Student's *t* test was performed and statistically significant differences were indicated by \* (P<0.05), \*\* (P<0.01) or \*\*\* (P<0.001). (C) Detection of *MdSE* RNAi or OE transgenic plants at DNA level. M2000, DNA Marker 2000. PC1, positive control with *MdSE*-pGWB414 as a template. PC2, positive control with *MdSE*-pK7GWIWG2D as a template.

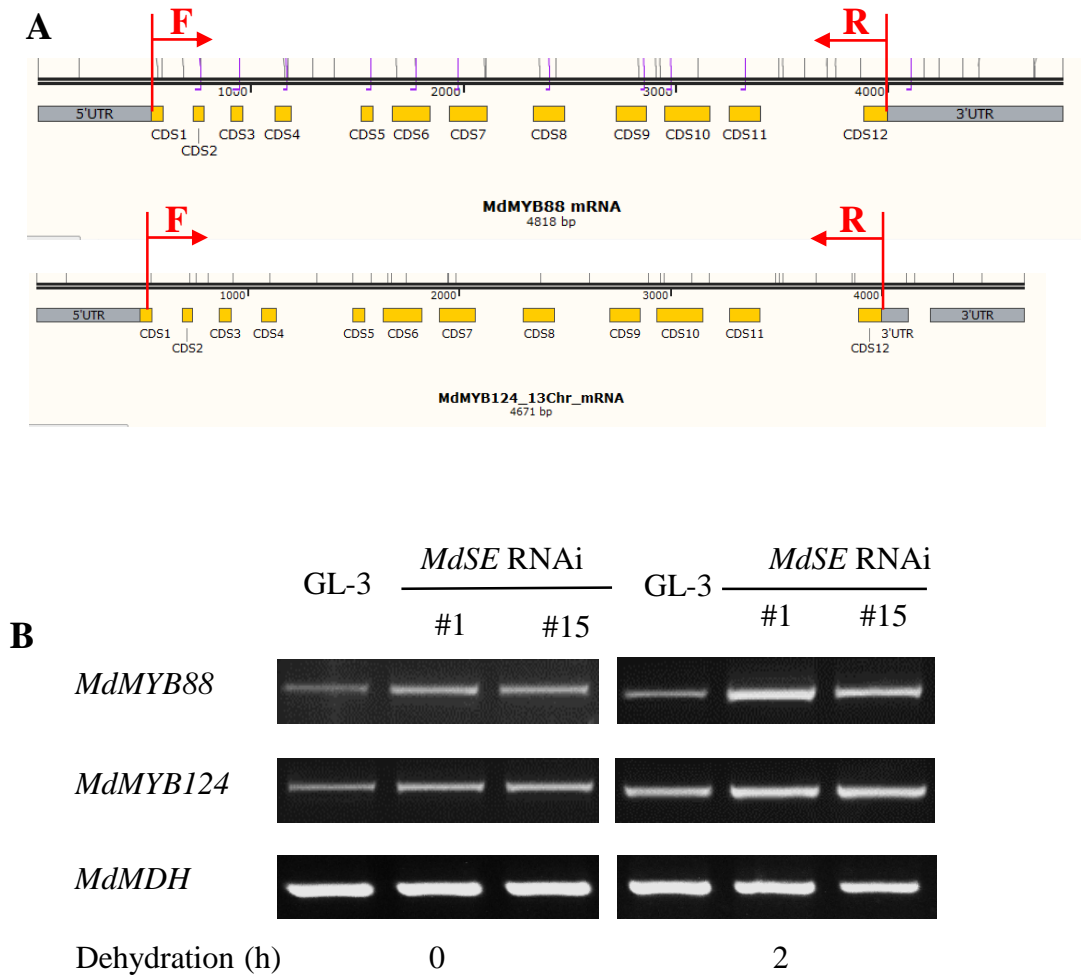

**Figure S4 MdSE does not affect splicing of *MdMYB88* or *MdMYB124*.** (A) The gene structure of *MdMYB88* and *MdMYB124*. The yellow squares represent exons, the blanks represent introns, and the grey squares were untranslated regions. The red lines marked the primers (forward primer and reverse primer) used for RT-PCR in (B). (B) *MdMYB88* or *MdMYB124* transcript in *MdSE* RNAi plants under control and drought conditions. Total RNA was extracted and reversely transcribed into the first strand cDNA which was then amplified using primers in (A). *MdMDH* was used as a control.

**A**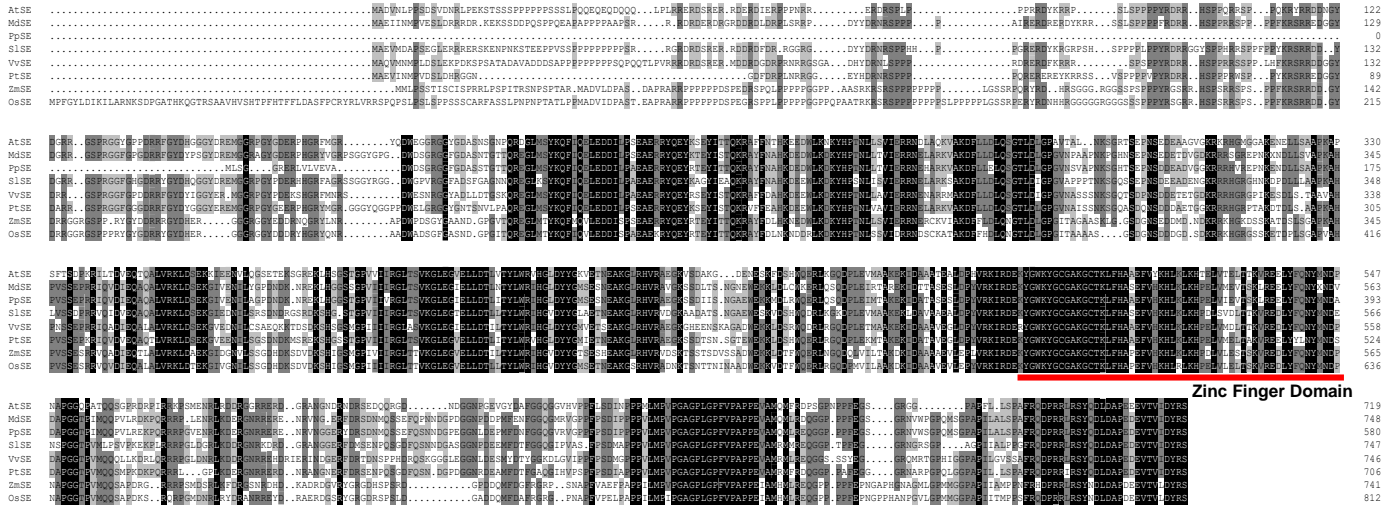**B**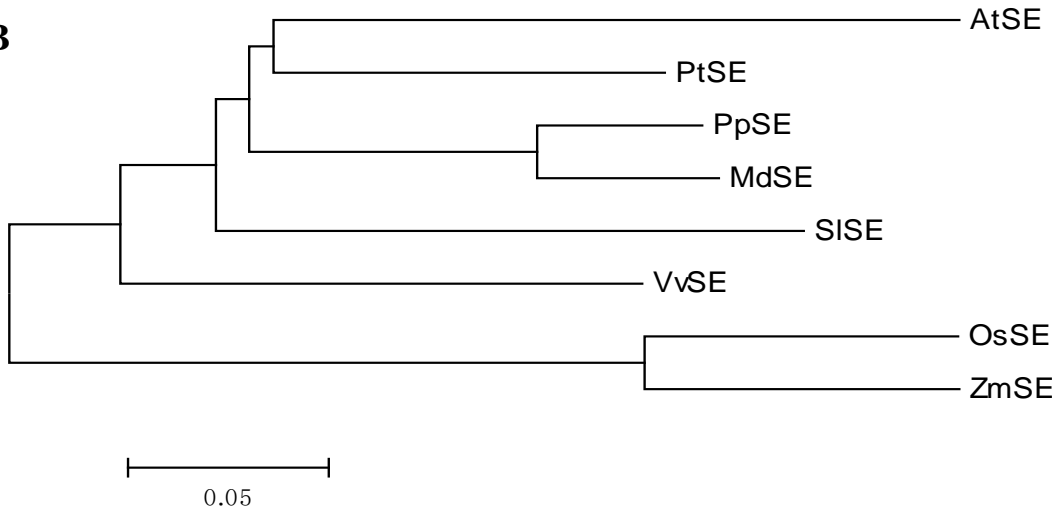

**Figure S5 Sequence similarity and phylogenetic tree of SE from different plant species.** (A) Multiple sequence alignment of SE in different plant species, including *Arabidopsis thaliana* (At), *Malus domestica* (Md), *Populus trichocarpa* (Pt), *Solanum lycopersicum* (Sl), *Vitis vinifera* (Vv), *Fragaria vesca* (Fv), *Oryza sativa* (Os), and *maize* (Zm). The underlined amino acids represent zinc-finger domain. (B) Phylogenetic tree of SE from different plant species.

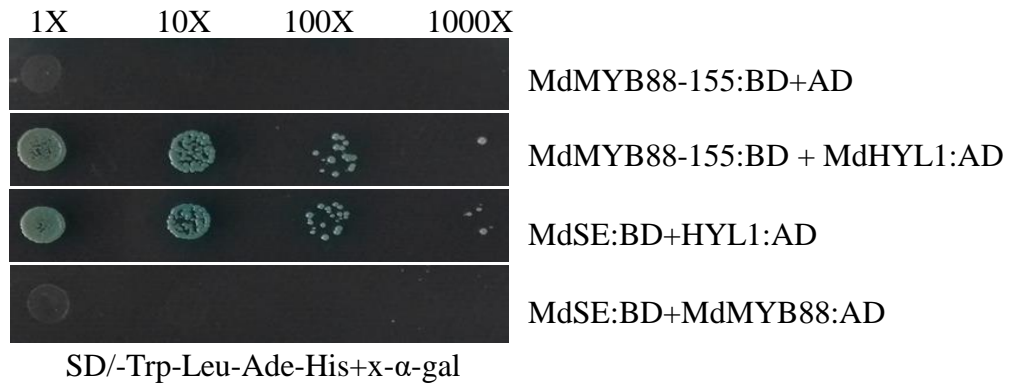

**Figure S6 MdHYL1 interacts with MdMYB88 and MdSE.** MdMYB88-155aa which lacks self-activation and full length MdSE were introduced into pGBDT7, respectively. The CDS of MdHYL1 and MdMYB88 were introduced into pGADT7. Positive clones were selected on SD media (-Leu-Trp-His-Ade + x- $\alpha$ -gal) to identify protein interactions.

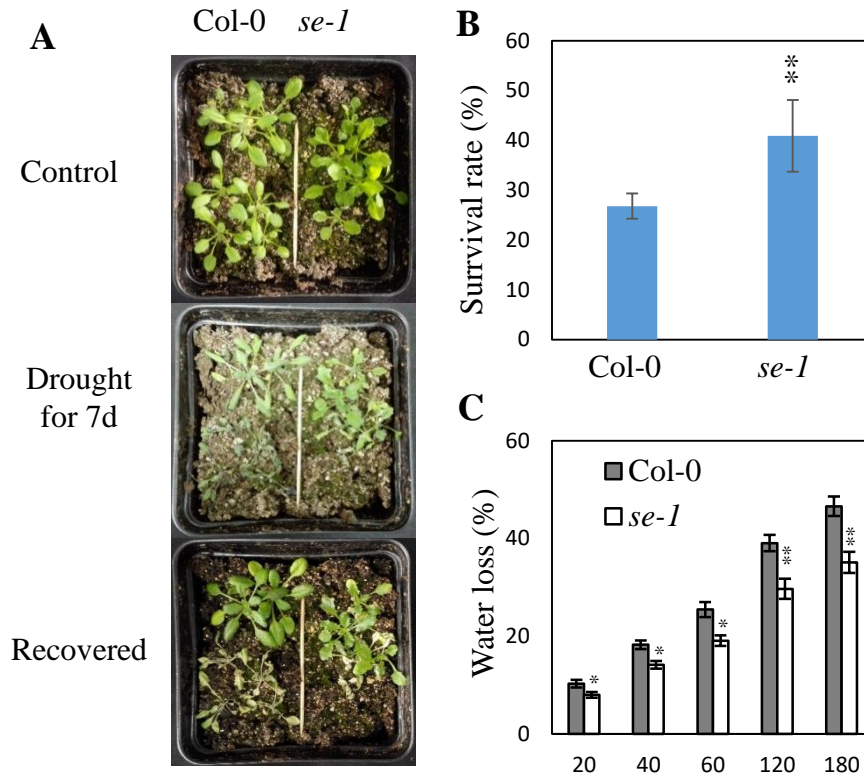

**Figure S7. Phenotype of *se-1* mutants under drought stress.** (A) Phenotypes of *se-1* mutants under drought. Water was withheld for 12 d, and rewatered for 7 d to calculate survival rate. (B) Survival rate of *se-1* mutants under drought stress. Data are means  $\pm$  SD (n = 20). (C) Water loss rate of *se-1* mutants under dehydration conditions. Data are means  $\pm$  SD (n = 10). Student's *t* test was performed and statistically significant differences were indicated by \* (P<0.05) or \*\* (P<0.01).

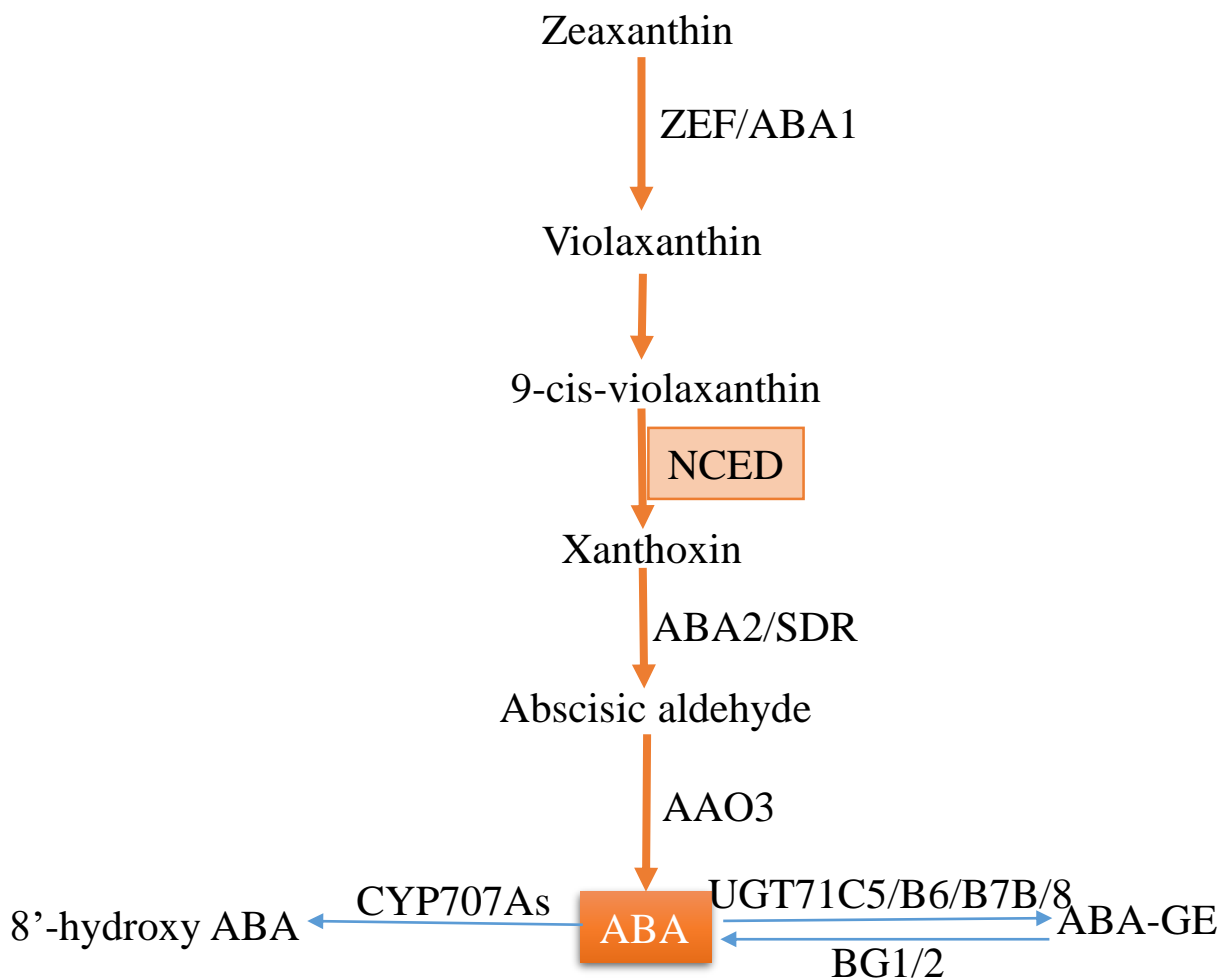

**Figure S8. A simplified pathway for biosynthesis of abscisic acid (ABA).** The *de novo* biosynthesis process of ABA is catalyzed by a series of enzymes including ZEF/ABA1 (zeaxanthin epoxidase), NCED (9-cis-epoxycarotenoid dioxygenases), ABA2/SDR (ABA-deficient 2) and AAO3 (ABA-aldehyde oxidase 3). The degradation process of ABA is catalyzed mainly by two ways, one is catalyzed by CYP707As (cytochrome P450 707A subfamily monooxygenases) to 8'-hydroxy ABA, and the other one is catalyzed by UGT71C5/B6/B7/B8 (UDP-glucosyltransferase) to ABA-GE which can also be converted to ABA by BG1/2 (glycosyl hydrolase).
